# Supplementary material for: State-dependent diffusion of actin-depolymerizing factor/cofilin underlies the enlargement and shrinkage of dendritic spines
Source: PubMed Central journal article supplement (PMC5011767; doi:10.1038/srep32897), 2016-09-06
Supplement: srep32897-s1.pdf [file srep32897-s1.pdf]

**State-dependent diffusion of actin-depolymerizing factor/cofilin underlies the enlargement and shrinkage of dendritic spines**

Jun Noguchi, Tatsuya Hayama, Satoshi Watanabe, Hasan Ucar, Sho Yagishita, Noriko Takahashi & Haruo Kasai

### A 2P-Glu Uncaging ( $1 \text{ Mg}^{2+}$ )

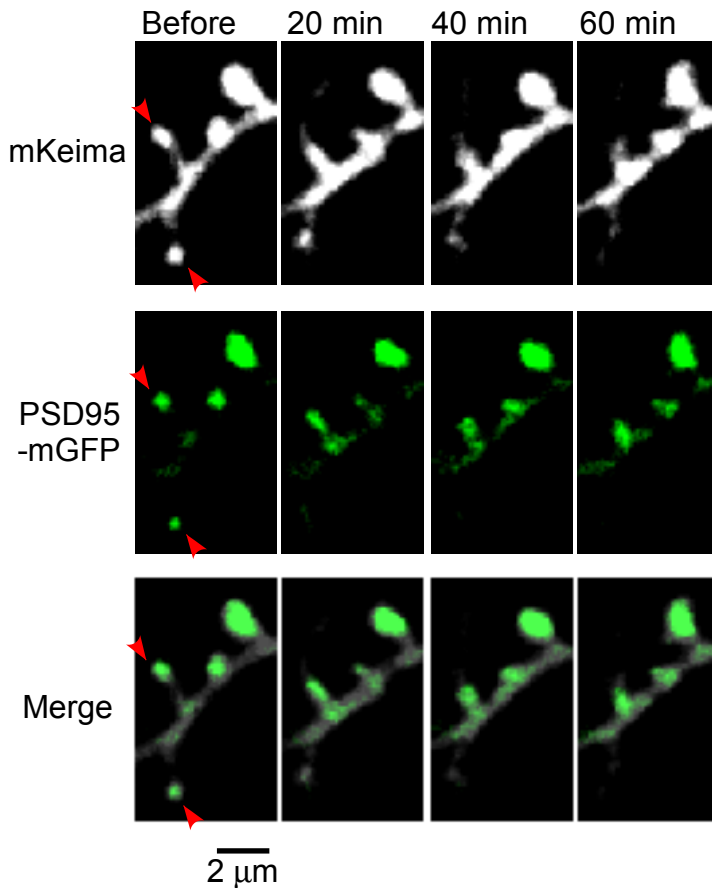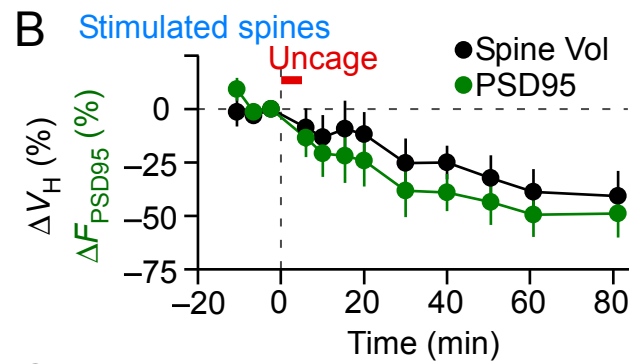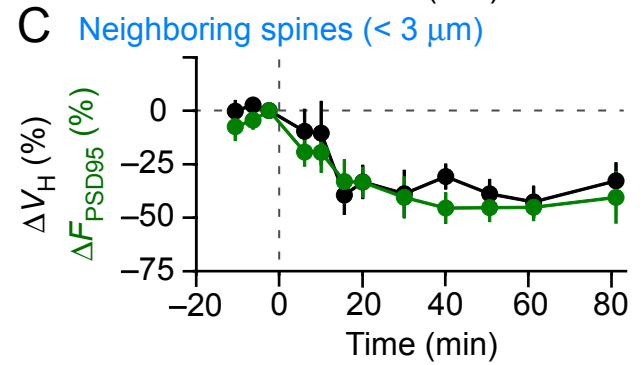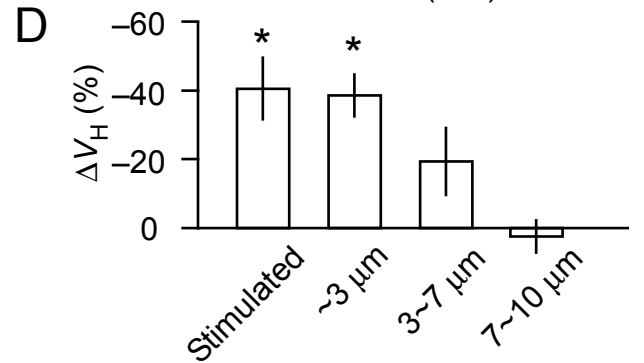

### Supplementary Figure S1. Spine shrinkage induced by low-frequency uncaging stimulation (LFS).

Glutamate uncaging was applied at 1 Hz for 5 min in a slice preparation that was transfected with mKeima and PSD95-mGFP. LFS via glutamate uncaging was applied to non-whole-cell clamped neurons, and spine volume changes were measured according to mKeima fluorescence. **(A)** Images of a dendrite where two spines, which are indicated by the red arrows, were subjected to LFS. The upper and lower panels show mKeima and PSD95-mGFP, respectively. **(B, C)** Time course of the change in spine volumes and PSD95-mGFP fluorescence of spines subjected to LFS (red bar, eight spines, five dendrites) (B) or those in the neighboring spines ( $< 3 \mu\text{m}$  from the stimulated spine, seven spines) (C). **(D)** The average reduction in spine volumes at each distance from the stimulated spines (stimulated,  $-41\% \pm 9.4\%$ , eight spines, five dendrites;  $< 3 \mu\text{m}$ ,  $39\% \pm 6.4\%$ , seven spines;  $3\text{--}7 \mu\text{m}$ ,  $-19\% \pm 10\%$ , 15 spines;  $7\text{--}10 \mu\text{m}$ ,  $2.5\% \pm 5.1\%$ , eight spines). The volume reduction was significant according to the Wilcoxon signed-rank test vs. zero for  $< 3 \mu\text{m}$  ( $p = 0.018$ ) but was not significant for  $3\text{--}7 \mu\text{m}$  and  $7\text{--}10 \mu\text{m}$  at  $p = 0.088$  and  $0.58$ , respectively. Data represent the mean  $\pm$  SEM,  $*p < 0.05$ .
